# Supplementary material
Source: Springer Nature journal article supplement (https://www.springermedizin.de/resource/supplementary/12943_2010_716_MOESM12_ESM.pdf/9554646)

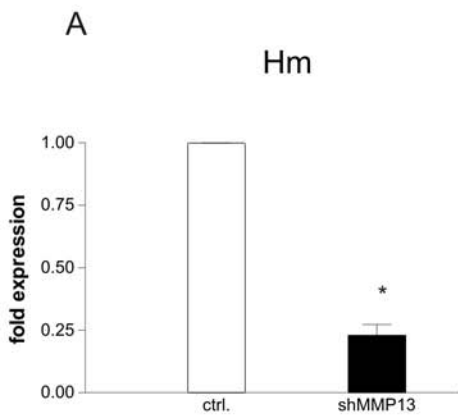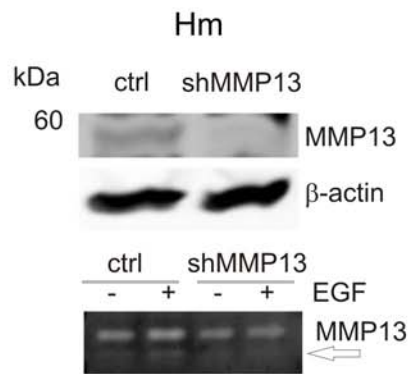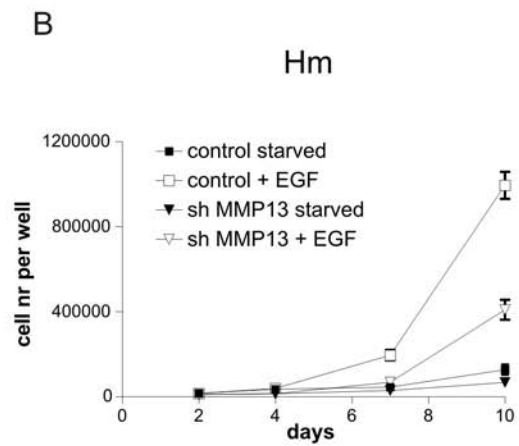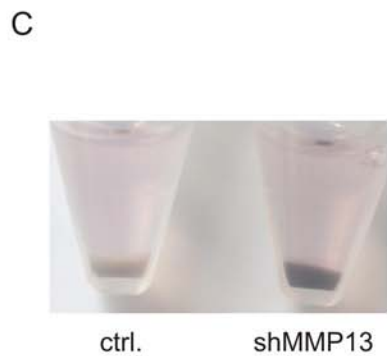

|         | melanin content (pg/cell) |
|---------|---------------------------|
| ctrl    | 19.55 (+/- 1.01)          |
| shMMP13 | 41.46 (+/- 6.60)          |

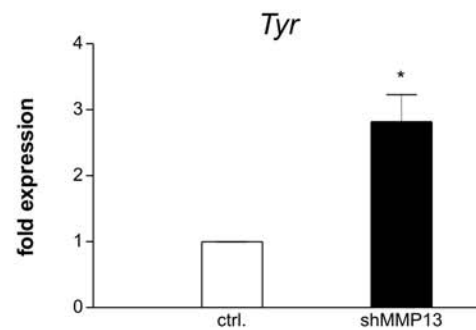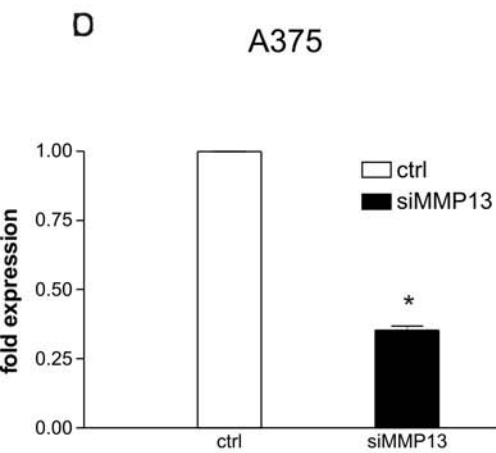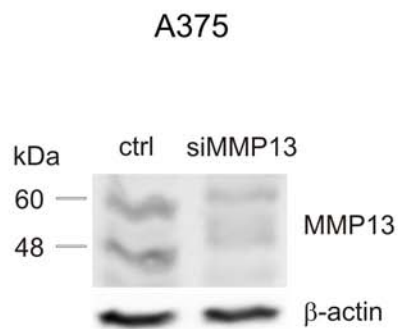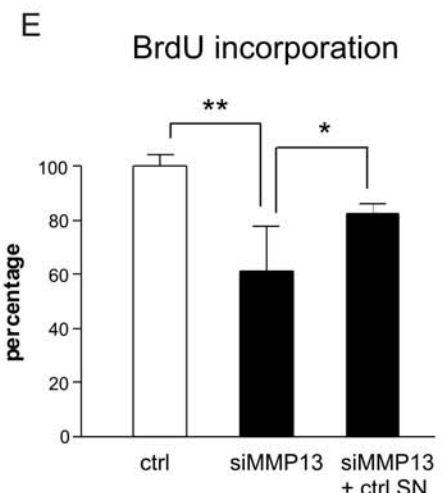

Supplement: MOESM12 [file 9554646]
